# Supplementary material
Source: PubMed Central journal article supplement (PMC4275411)
Supplement: NIHMS635127-supplement-01.pdf [file NIHMS635127-supplement-01.pdf]

Supplementary table 1. Study population stratified by presence or absence of self reported heart failure at baseline.

| <b>Stratum-specific n (%) or mean (SD) by heart failure</b> |                    |                                                          |                                                         |                |
|-------------------------------------------------------------|--------------------|----------------------------------------------------------|---------------------------------------------------------|----------------|
|                                                             |                    | <b>Self-reported heart failure at baseline<br/>n=382</b> | <b>No heart failure reported at baseline<br/>n=3557</b> | <b>p-value</b> |
| Age (yrs)                                                   | 21 to < 45         | 19 (5.0)                                                 | 519 (14.6)                                              | <.0001         |
|                                                             | 45 to < 65         | 229 (59.9)                                               | 2032 (57.1)                                             | <.0001         |
|                                                             | 65+                | 134 (35.1)                                               | 1006 (28.3)                                             | <.0001         |
| Gender                                                      | Male               | 220 (57.6)                                               | 1941 (54.6)                                             | 0.26           |
| Race-Ethnicity                                              | Non-Hispanic White | 117 (30.6)                                               | 1521 (42.8)                                             | <.0001         |
|                                                             | Non-Hispanic Black | 217 (56.8)                                               | 1433 (40.3)                                             | <.0001         |
|                                                             | Hispanic           | 37 (9.7)                                                 | 460 (12.9)                                              | <.0001         |
|                                                             | Other              | 11 (2.9)                                                 | 143 (4.0)                                               | <.0001         |
| Current Smoker                                              |                    | 54 (14.1)                                                | 463 (13.0)                                              | 0.54           |
| Systolic Blood Pressure (mmHg)                              |                    | 128.80 (23.7)                                            | 128.46 (22.0)                                           | 0.78           |
| Diastolic Blood Pressure (mmHg)                             |                    | 67.88 (14)                                               | 71.94 (12.6)                                            | <.0001         |
| Hypertension                                                |                    | 347 (90.8)                                               | 3044 (85.6)                                             | 0.005          |
| Diabetes                                                    |                    | 263 (68.8)                                               | 1645 (46.2)                                             | <.0001         |

|                                                                                      |                                    |                       |                       |        |
|--------------------------------------------------------------------------------------|------------------------------------|-----------------------|-----------------------|--------|
| Body Mass Index Category                                                             | < 25 )                             | 41 (10.8)             | 589 (16.6)            | 0.002  |
|                                                                                      | 25 to < 30                         | 100 (26.3)            | 1025 (28.9)           | 0.002  |
|                                                                                      | > 30 )                             | 239 (62.9)            | 1935 (54.5)           | 0.002  |
| Ankle Brachial Index                                                                 | <0.90                              | 99 (27.2)             | 526 (15.0)            | <.0001 |
|                                                                                      | 0.90-<1.10                         | 150 (41.2)            | 1663 (47.3)           | <.0001 |
|                                                                                      | 1.10-<1.40                         | 108 (29.7)            | 1235 (35.2)           | <.0001 |
|                                                                                      | >= 1.40                            | 7 (1.9)               | 89 (2.5)              | <.0001 |
| Angiotensin Converting<br>Enzyme inhibitor or<br>Angiotensin receptor blocker<br>use |                                    | 296 (77.9)            | 2393 (67.8)           | <.0001 |
| Serum Creatinine (mg/dL)                                                             |                                    | 2.05 (0.65)           | 1.82 (0.64)           | <.0001 |
| Estimated Glomerular<br>Filtration Rate<br>(ml/min/1.73m <sup>2</sup> )              |                                    | 37.51<br>(13.97)      | 45.69<br>(16.94)      | <.0001 |
| 24H Urine Protein (g/24H)                                                            | Median<br>(Interquartile<br>range) | 0.25 (0.08 -<br>1.11) | 0.17 (0.07 -<br>0.90) | 0.01   |
| Hemoglobin (g/dL)                                                                    |                                    | 12.29 (1.83)          | 12.64 (1.77)          | 0.0003 |
| Calcium (mg/dL)                                                                      |                                    | 9.15 (0.50)           | 9.18 (0.51)           | 0.26   |
| Phosphate (mg/dL)                                                                    |                                    | 3.88 (0.72)           | 3.71 (0.66)           | <.0001 |
| Fibroblast Growth Factor-23<br>(FGF-23) (RU/ml)                                      |                                    | 352.38<br>(482.56)    | 220.46<br>(458.75)    | <.0001 |
| Total Parathyroid Hormone<br>(pg/ml)                                                 |                                    | 100.22<br>(101.46)    | 72.32<br>(66.81)      | <.0001 |
| Brain Natriuretic Peptide (<br>BNP)                                                  |                                    | 271.97<br>(432.2)     | 84.42<br>(222.7)      | <.0001 |

|                                                      |                    |                    |        |
|------------------------------------------------------|--------------------|--------------------|--------|
| N-terminal pro b-type<br>natriuretic peptide (pg/mL) | 1780.0<br>(3486.9) | 438.73<br>(1547.7) | <.0001 |
|------------------------------------------------------|--------------------|--------------------|--------|

Supplementary table 2. Association between baseline CVD and outcomes in analyses considering death as a competing risk

| <b>Model</b>                                                                                                                                | <b>Any CVD</b>     | <b>MI/Prior revascularization</b> | <b>Heart Failure</b> | <b>Stroke</b>     | <b>Peripheral Vascular Disease</b> |
|---------------------------------------------------------------------------------------------------------------------------------------------|--------------------|-----------------------------------|----------------------|-------------------|------------------------------------|
| <b>Model 1 (Unadjusted)</b>                                                                                                                 | 1.26* (1.11, 1.42) | 1.07 (0.93, 1.23)                 | 1.33* (1.10, 1.60)   | 1.13 (0.93, 1.37) | 1.69* (1.38, 2.08)                 |
| <b>Model2</b><br>Model 1+ gender, age, race, and clinical sites                                                                             | 1.27* (1.11, 1.45) | 1.14 (0.98, 1.32)                 | 1.20 (0.98, 1.46)    | 1.02 (0.84, 1.25) | 1.60* (1.28, 2.00)                 |
| <b>Model 3</b><br>Model 2+ Systolic BP, triglycerides, HDL, Body Mass Index, smoking, Diabetes, eGFr, Urine protein, ACE/ARB use Hemoglobin | 0.97 (0.84, 1.13)  | 1.08 (0.92, 1.28)                 | 0.97 (0.77, 1.23)    | 0.91 (0.73, 1.14) | 0.87 (0.67, 1.14)                  |
| <b>Model 4</b><br><b>Model 3+FGF 23</b>                                                                                                     | 0.97 (0.84, 1.13)  | 1.09 (0.92, 1.28)                 | 0.97 (0.77, 1.22)    | 0.91 (0.73, 1.14) | 0.88 (0.68, 1.14)                  |

Supplementary Table 3. Risk for outcomes adjusted for FGF-23 in addition to Systolic BP, triglycerides, HDL, Body Mass Index, smoking, Diabetes, eGFR, Urine protein, ACE/ARB use Hemoglobin,

| <b>Model</b>                                                                 | <b>Any CVD</b>    | <b>MI/Prior<br/>revascularization</b> | <b>Heart Failure</b>  | <b>Stroke</b>     | <b>Peripheral<br/>Vascular<br/>Disease</b> |
|------------------------------------------------------------------------------|-------------------|---------------------------------------|-----------------------|-------------------|--------------------------------------------|
| ESRD or 50% decline<br>in GFR<br>Hazard ratio (95% CI)<br>Model 3 + FGF-23   | 1.03 (0.89, 1.18) | 1.16 (1.00, 1.36)                     | 1.25* (1.03,<br>1.53) | 0.93 (0.76, 1.14) | 0.92 (0.74, 1.14)                          |
| Rate of change of GFR<br>Parameter estimate (p<br>value)<br>Model 3 + FGF-23 | -0.06 (0.09)      | -0.14 (0.1)                           | -0.10 (0.15)          | -0.01 (0.14)      | 0.08 (0.17)                                |
